# Supplementary material for: Influence of the Thermal Processing and Doping on LaMnO3 and La0.8A0.2MnO3 (A = Ca, Sr, Ba) Perovskites Prepared by Auto-Combustion for Removal of VOCs
Source: MDPI journal article supplement (doi:10.3390/catal12080865), 2022-08-05
Supplement: s1 [file s1]

## Supplementary Materials

# **Influence of the thermal processing and doping of $\text{LaMnO}_3$ and $\text{La}_{0.8}\text{A}_{0.2}\text{MnO}_3$ (A=Ca, Sr, Ba) perovskites prepared by auto-combustion for removal of VOCs**

**Natasha Di Benedetto<sup>1</sup>, Carolina De los Santos<sup>2,\*</sup>, María del Pilar Yeste<sup>3</sup>, Jonder Morais<sup>4</sup>, Maria do Carmo Martins Alves<sup>5</sup>, Alejandro Amaya<sup>2</sup>, Leopoldo Suescun<sup>1,\*</sup>, José Manuel Gatica<sup>3</sup>, Hilario Vidal<sup>3</sup> and Jorge Castiglioni<sup>2</sup>**

<sup>1</sup> Laboratorio de Cristalografía, Química del Estado Sólido y Materiales/DETEMA/Facultad de Química/Universidad de la República, Av. Gral. Flores 2124, Montevideo 11800, Uruguay

<sup>2</sup> Laboratorio de Fisicoquímica de Superficies/Área Fisicoquímica/DETEMA/Facultad de Química/Universidad de la República, Av. Gral. Flores 2124, Montevideo 11800, Uruguay

<sup>3</sup> Departamento C.M. I.M. y Química Inorgánica, Universidad de Cádiz, Puerto Real 11510, Spain

<sup>4</sup> Laboratório de Espectroscopia de Elétrons (LEe-), Instituto de Física – Universidade Federal do Rio Grande do Sul, 91501-970 Porto Alegre, RS, Brazil

<sup>5</sup> Instituto de Química - Universidade Federal do Rio Grande do Sul, 91501-970, Porto Alegre, RS, Brazil

\* Correspondence: [leopoldo@fq.edu.uy](mailto:leopoldo@fq.edu.uy) (L.S.); [cdlsantos@fq.edu.uy](mailto:cdlsantos@fq.edu.uy) (C.DIS.)

**Table S1.** ICP-AES spectroscopic results obtained for LM, LCM, LSM and LBM samples

| Sample | % La<br>(atomic) | % Mn<br>(atomic) | % Sr<br>(atomic) | % Ca<br>(atomic) | % Ba<br>(atomic) |
|--------|------------------|------------------|------------------|------------------|------------------|
| LM     | 50.2 ± 1.8       | 49.8 ± 2.2       | -                | -                | -                |
| LSM    | 41.5 ± 1.7       | 50.2 ± 2.8       | 9.3 ± 0.4        | -                | -                |
| LCM    | 40.9 ± 1.9       | 50.6 ± 3.3       | -                | 8.4 ± 0.9        | -                |
| LBM    | 40.7 ± 1.7       | 50.1 ± 2.3       | -                | -                | 9.1 ± 0.1        |

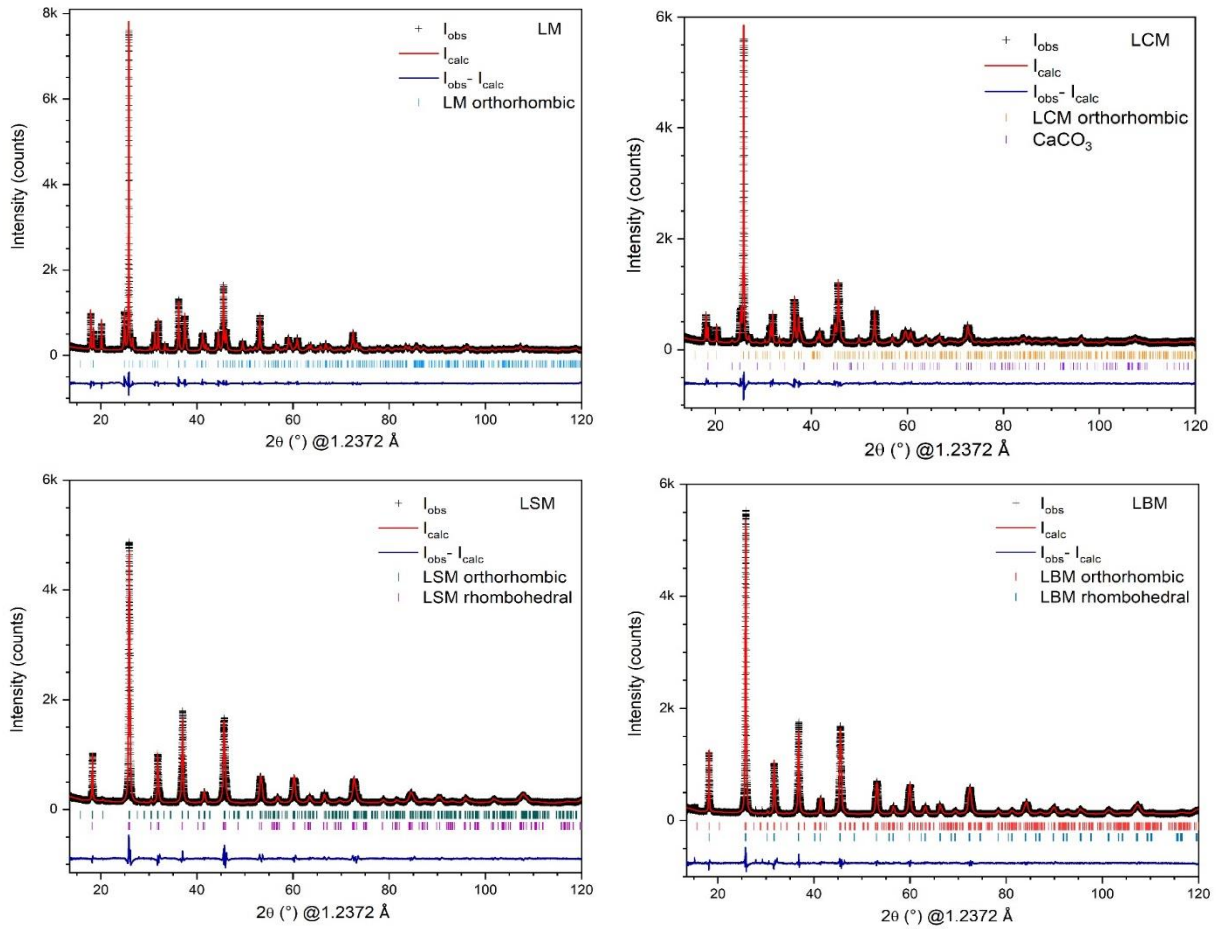

**Figure S1.** Rietveld fit of synchrotron XRD patterns of the as-prepared samples confirming the presence of pure manganites with perovskite structure (except for LCM that exhibits a 4.7% weight of  $\text{CaCO}_3$  impurity). The LSM and LBM samples are mixtures of orthorhombic Pbnm and rhombohedral Rc perovskite phases.

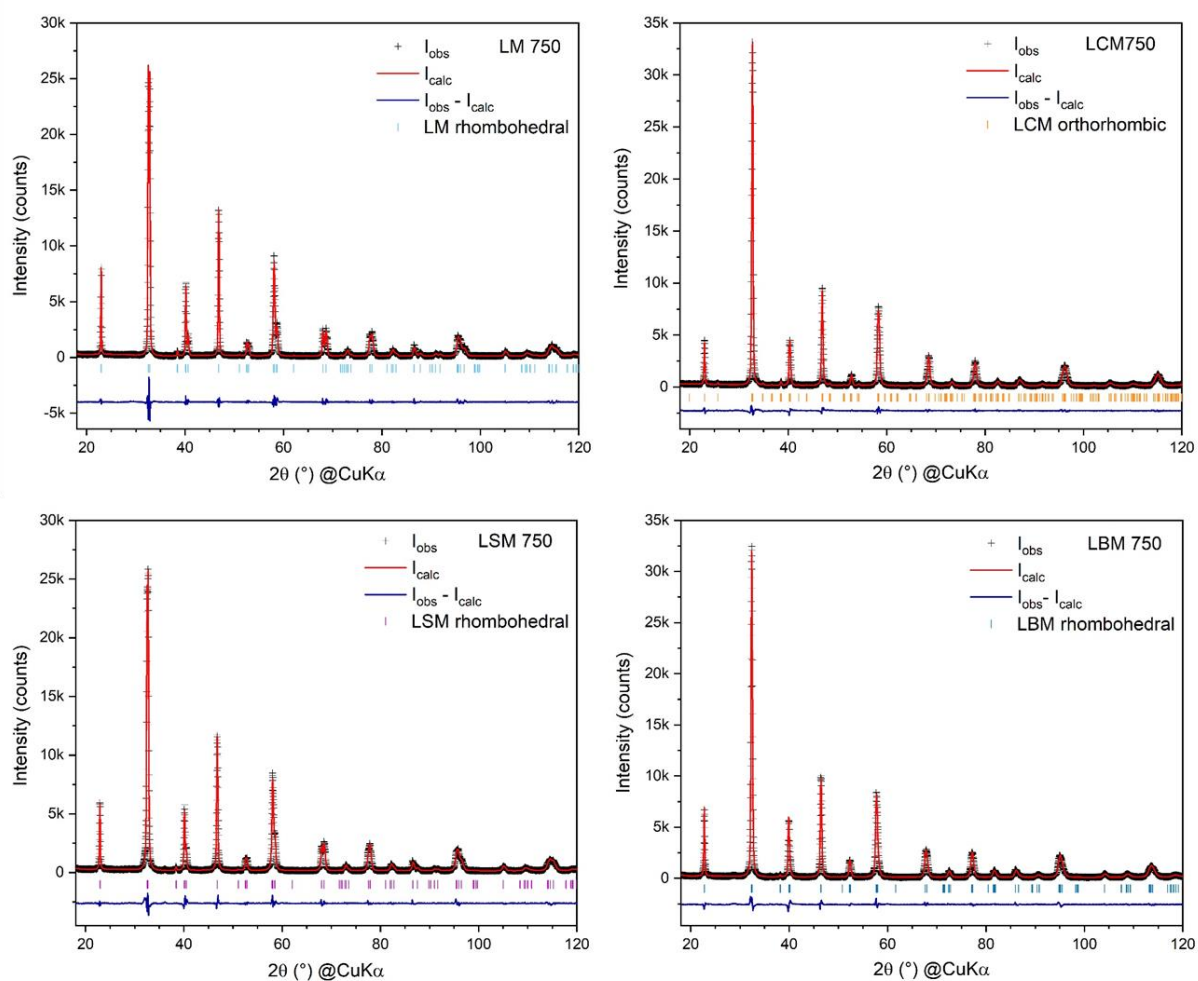

**Figure S2.** Rietveld fit of conventional XRD diffractograms of the calcined samples.

**Table S2.** Final parameters for the as-prepared samples XRD data obtained through Rietveld fit.

| Sample | S.G.         | weight % | a (Å)   | b (Å)   | c (Å)    | Rw (%) |
|--------|--------------|----------|---------|---------|----------|--------|
| LM     | Pbnm         | 100      | 5.53931 | 5.73236 | 7.70336  | 5.677  |
| LM750  | R $\bar{3}c$ | 100      | 5.51481 | -       | 13.34143 | 7.791  |
| LCM    | Pbnm         | 95.3     | 5.53691 | 5.65096 | 7.72597  | 5.296  |
| LCM750 | Pbnm         | 100      | 5.46882 | 5.50379 | 7.74017  | 7.119  |
| LSM    | Pbnm         | 58.2     | 5.54016 | 5.51013 | 7.78367  | 3.733  |
|        | R $\bar{3}c$ | 41.8     | 5.53273 | -       | 13.38227 |        |
| LSM750 | R $\bar{3}c$ | 100      | 5.51039 | -       | 13.3657  | 7.631  |
| LBM    | Pbnm         | 70.7     | 5.52219 | 5.56188 | 7.8192   | 4.424  |
|        | R $\bar{3}c$ | 29.3     | 5.54177 | -       | 13.57041 |        |
| LBM750 | R $\bar{3}c$ | 100      | 5.53637 | -       | 13.48379 | 7.764  |

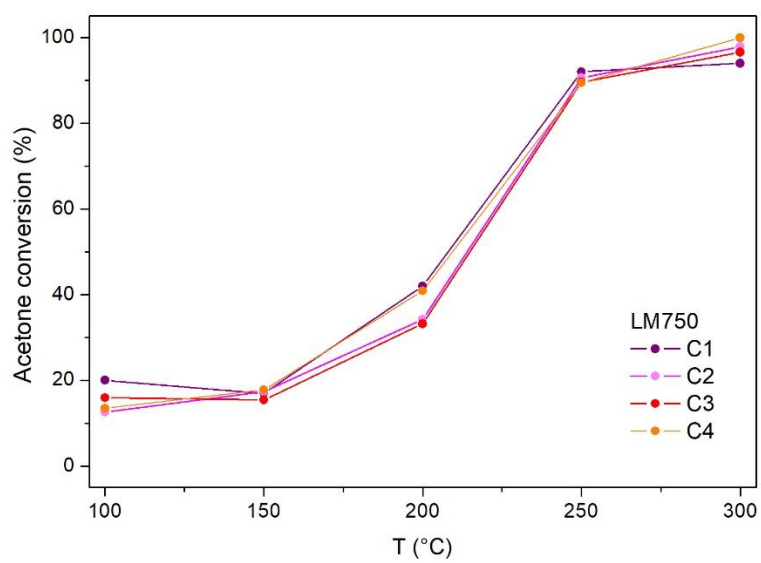

**Figure S3.** Acetone conversion of LM750 over four consecutive cycles showing no sign of catalyst deactivation.

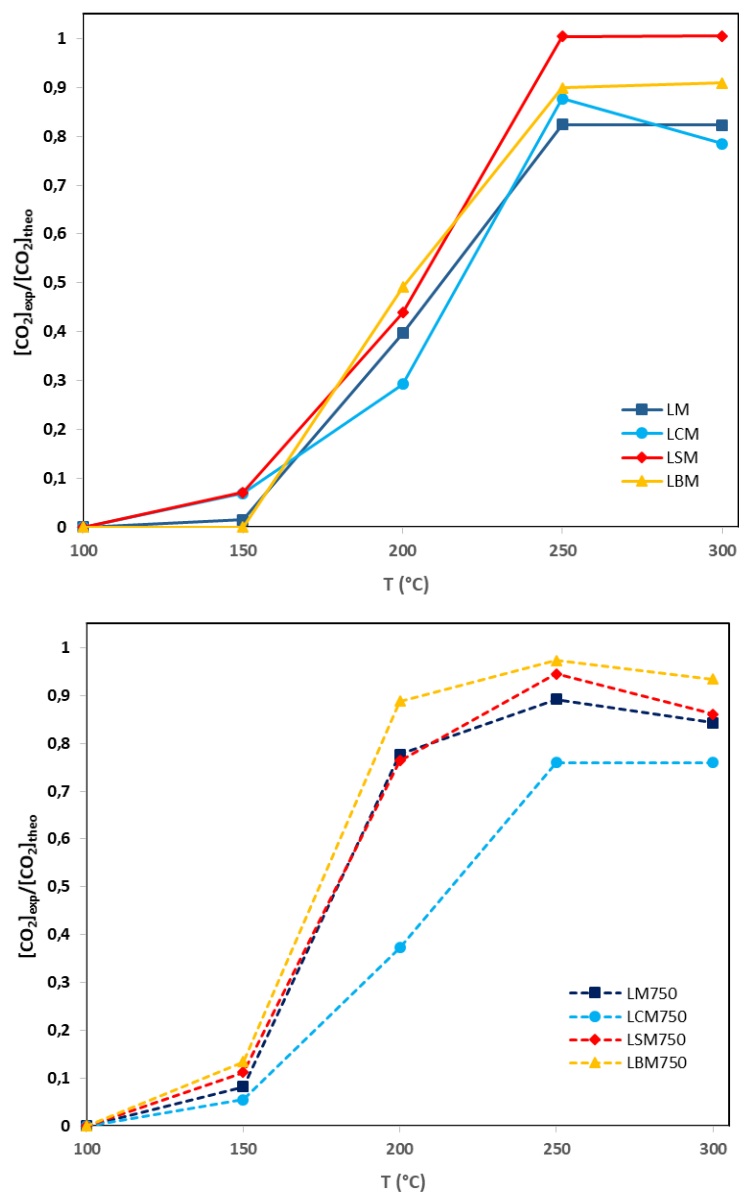

**Figure S4.**  $[\text{CO}_2]_{\text{experimental}}/[\text{CO}_2]_{\text{theoretical}}$  ratio vs temperature curves for the as-prepared manganites and the calcined samples.

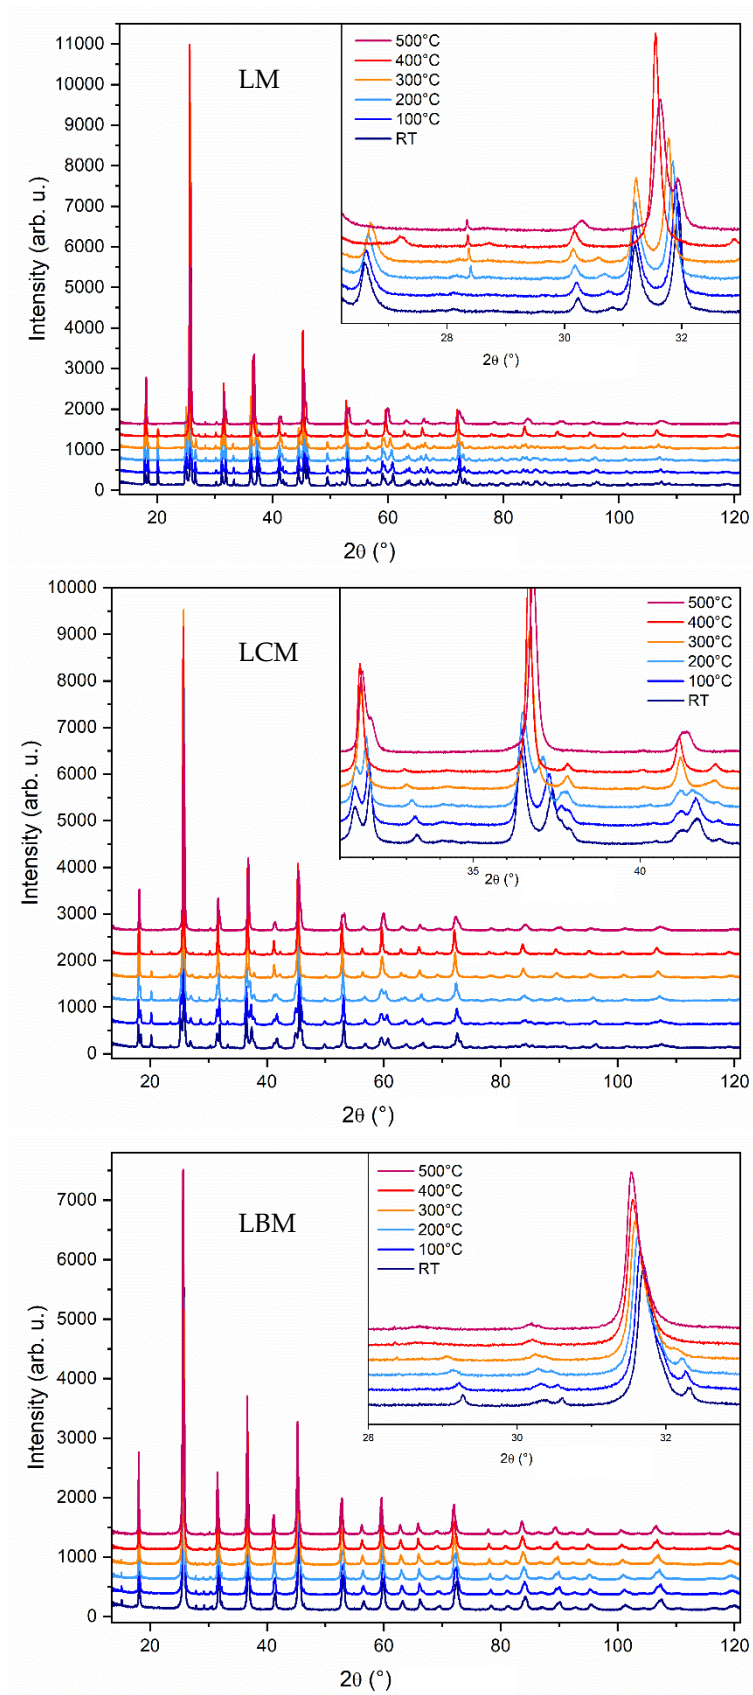



**Figure S5.** Synchrotron XRD patterns of the indicated as-prepared samples heated from RT to 500 °C in air. The insets show in more detail the appearance/disappearance of some peaks during the heating process.

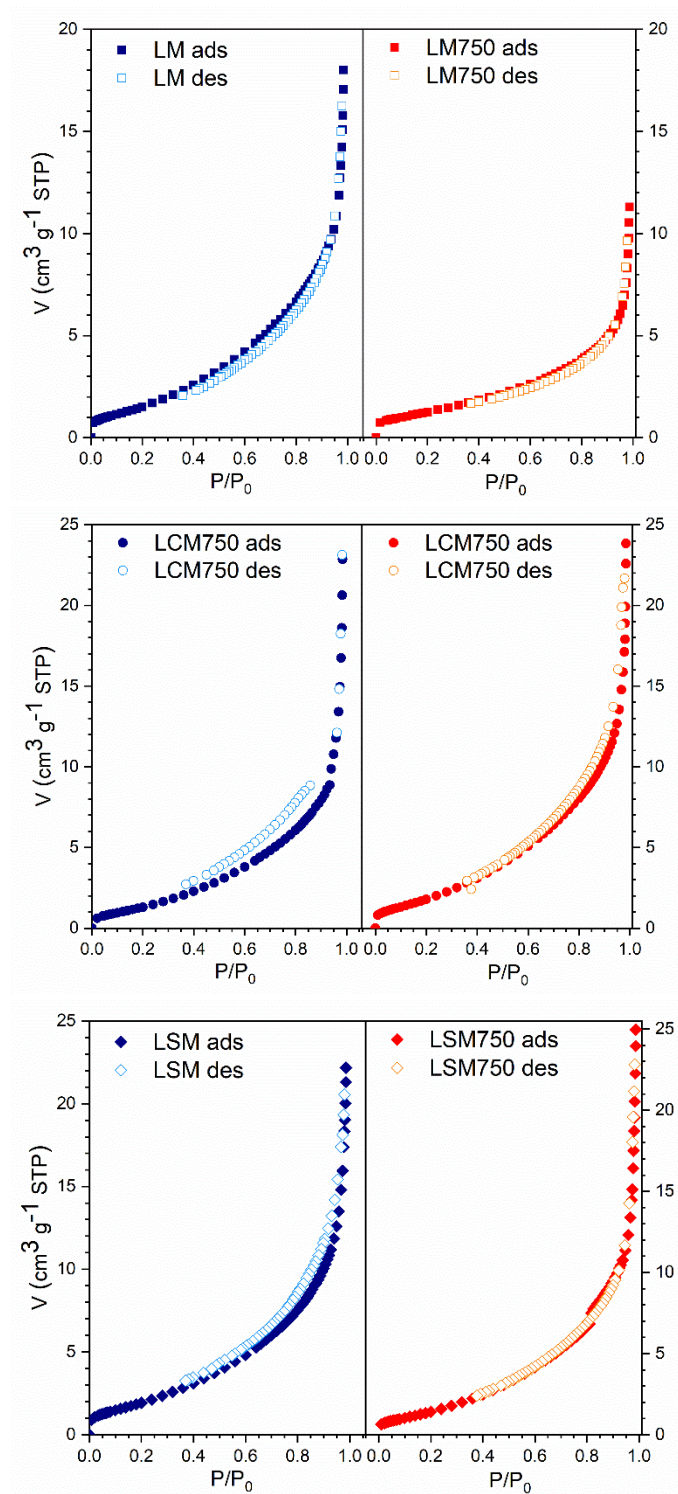



**Figure S6.** N<sub>2</sub> physisorption isotherms for the indicated as-prepared and calcined samples.

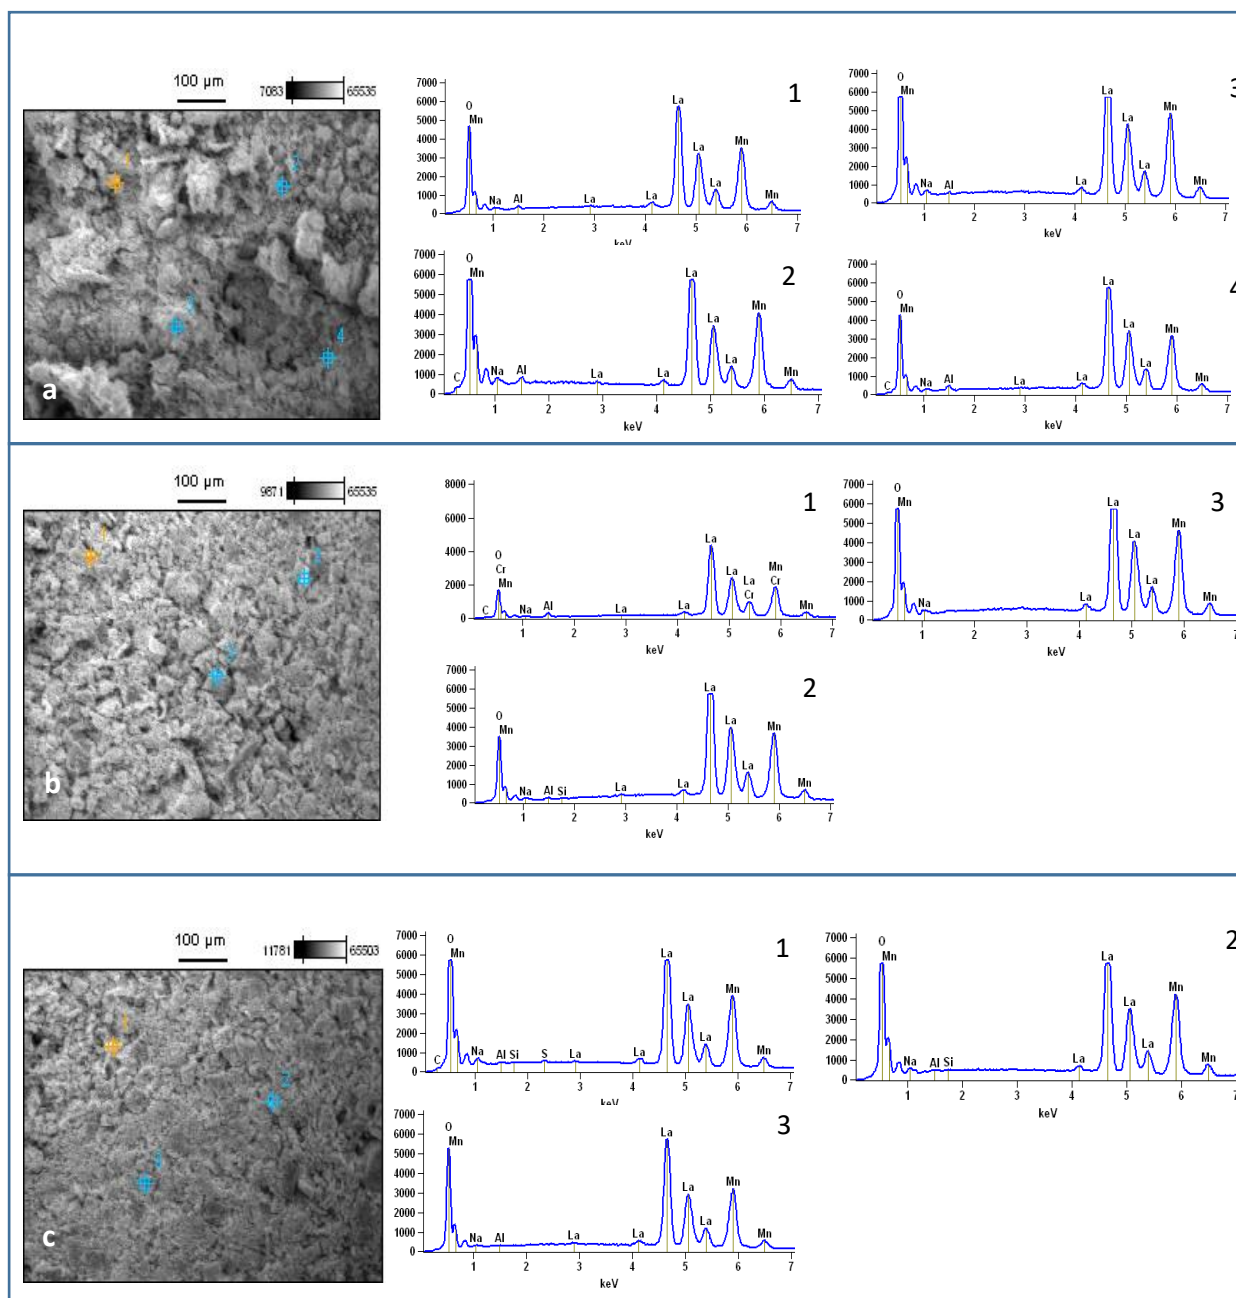

**Figure S7.** SEM images with EDS analysis corresponding to different zones of LM: (a) zone 1, (b) zone 2 and (c) zone 3.

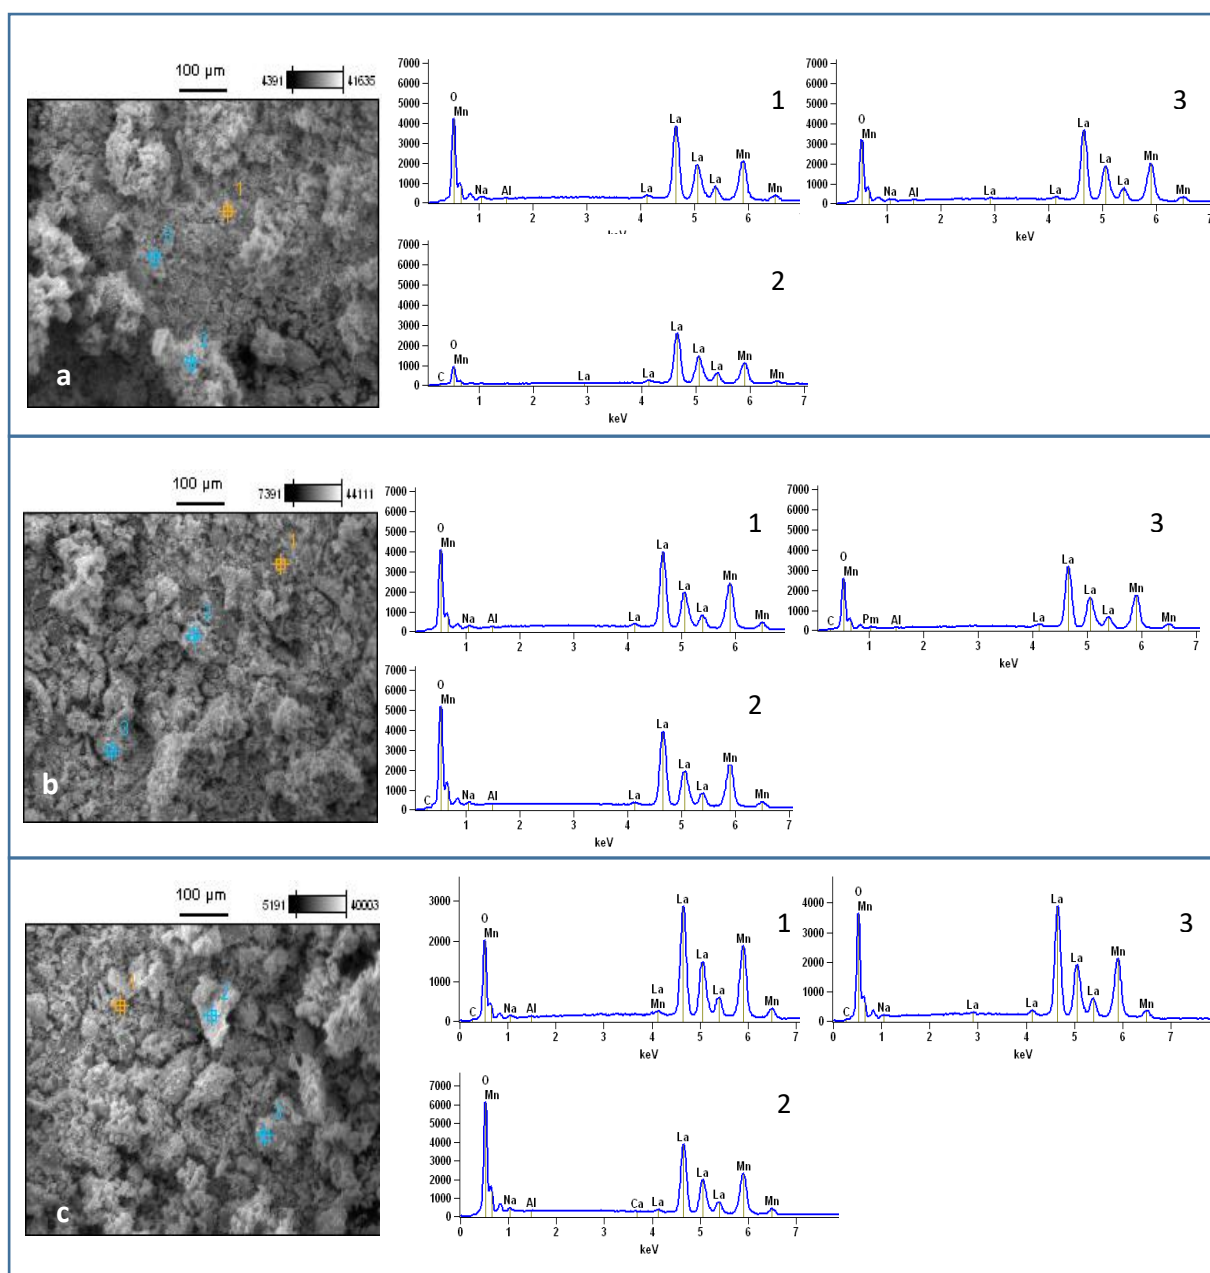

**Figure S8.** SEM images with EDS analysis corresponding to different zones of LM750: (a) zone 1, (b) zone 2 and (c) zone 3.

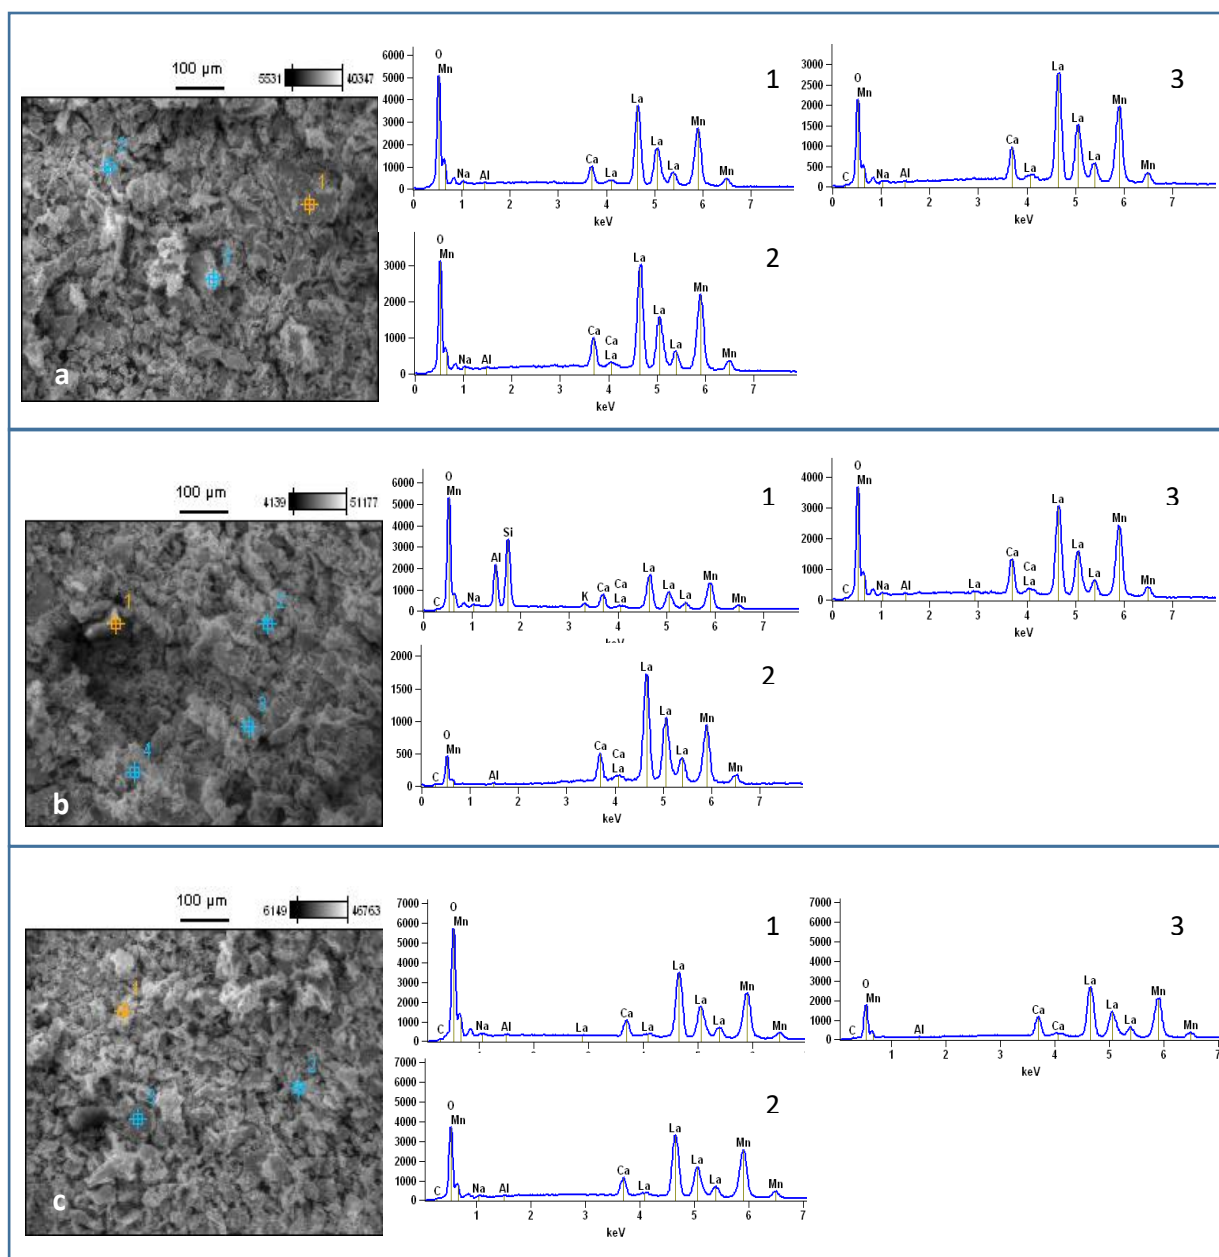

**Figure S9.** SEM images with EDS analysis corresponding to different zones of LCM: (a) zone 1, (b) zone 2 and (c) zone 3.

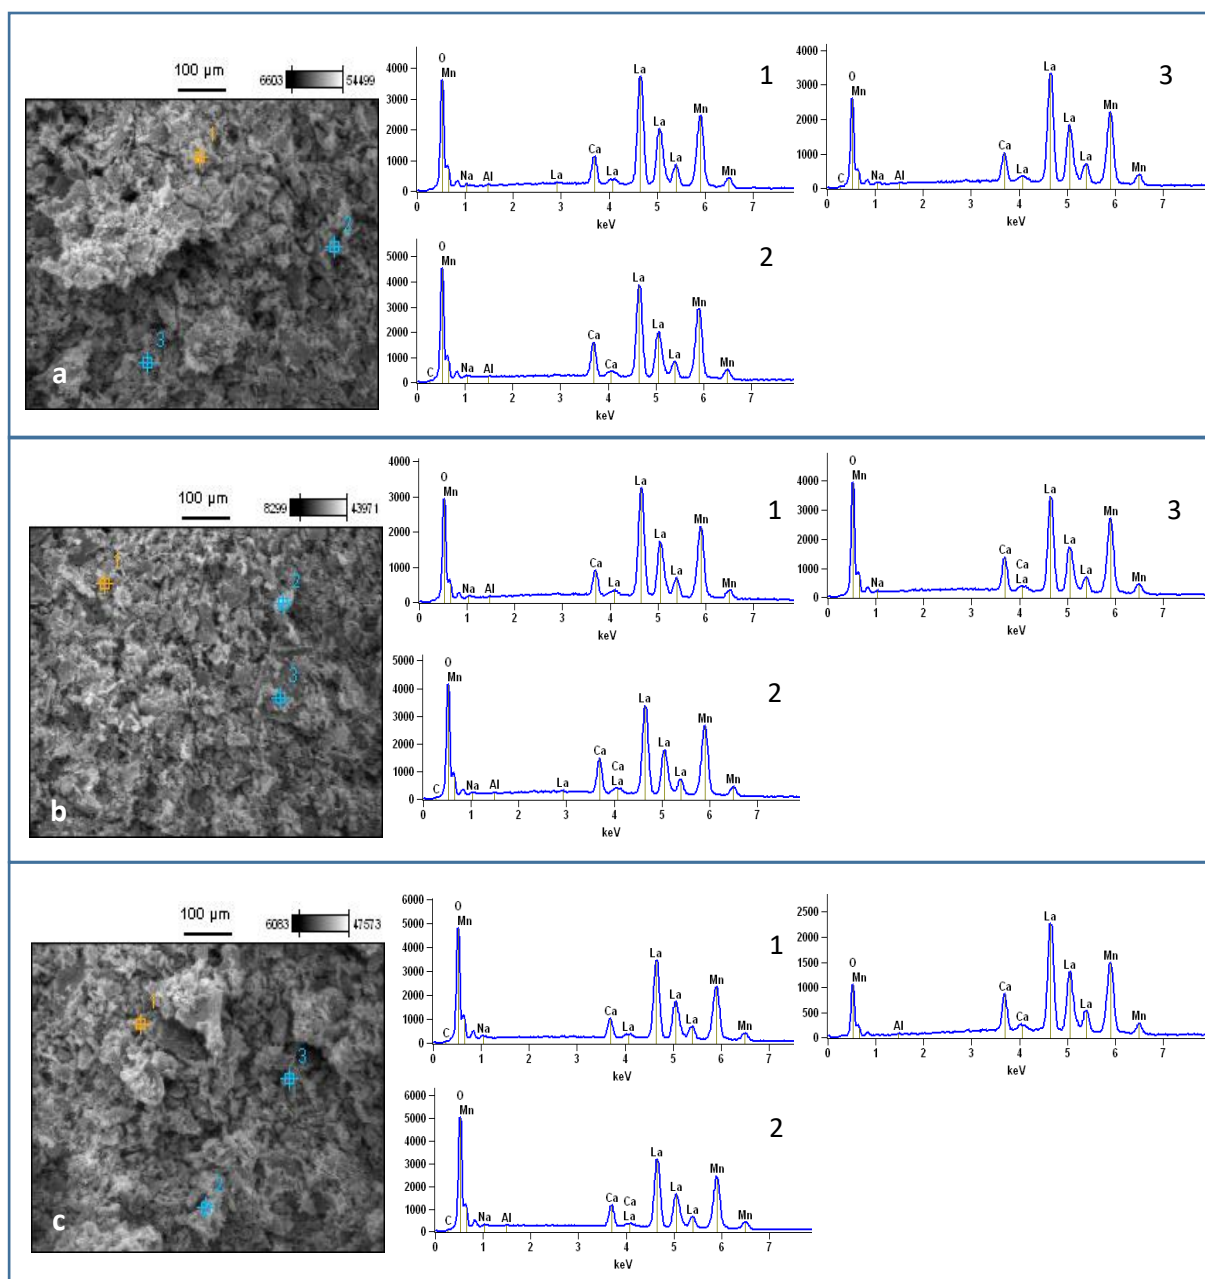

**Figure S10.** SEM images with EDS analysis corresponding to different zones of LCM750: (a) zone 1, (b) zone 2 and (c) zone 3.

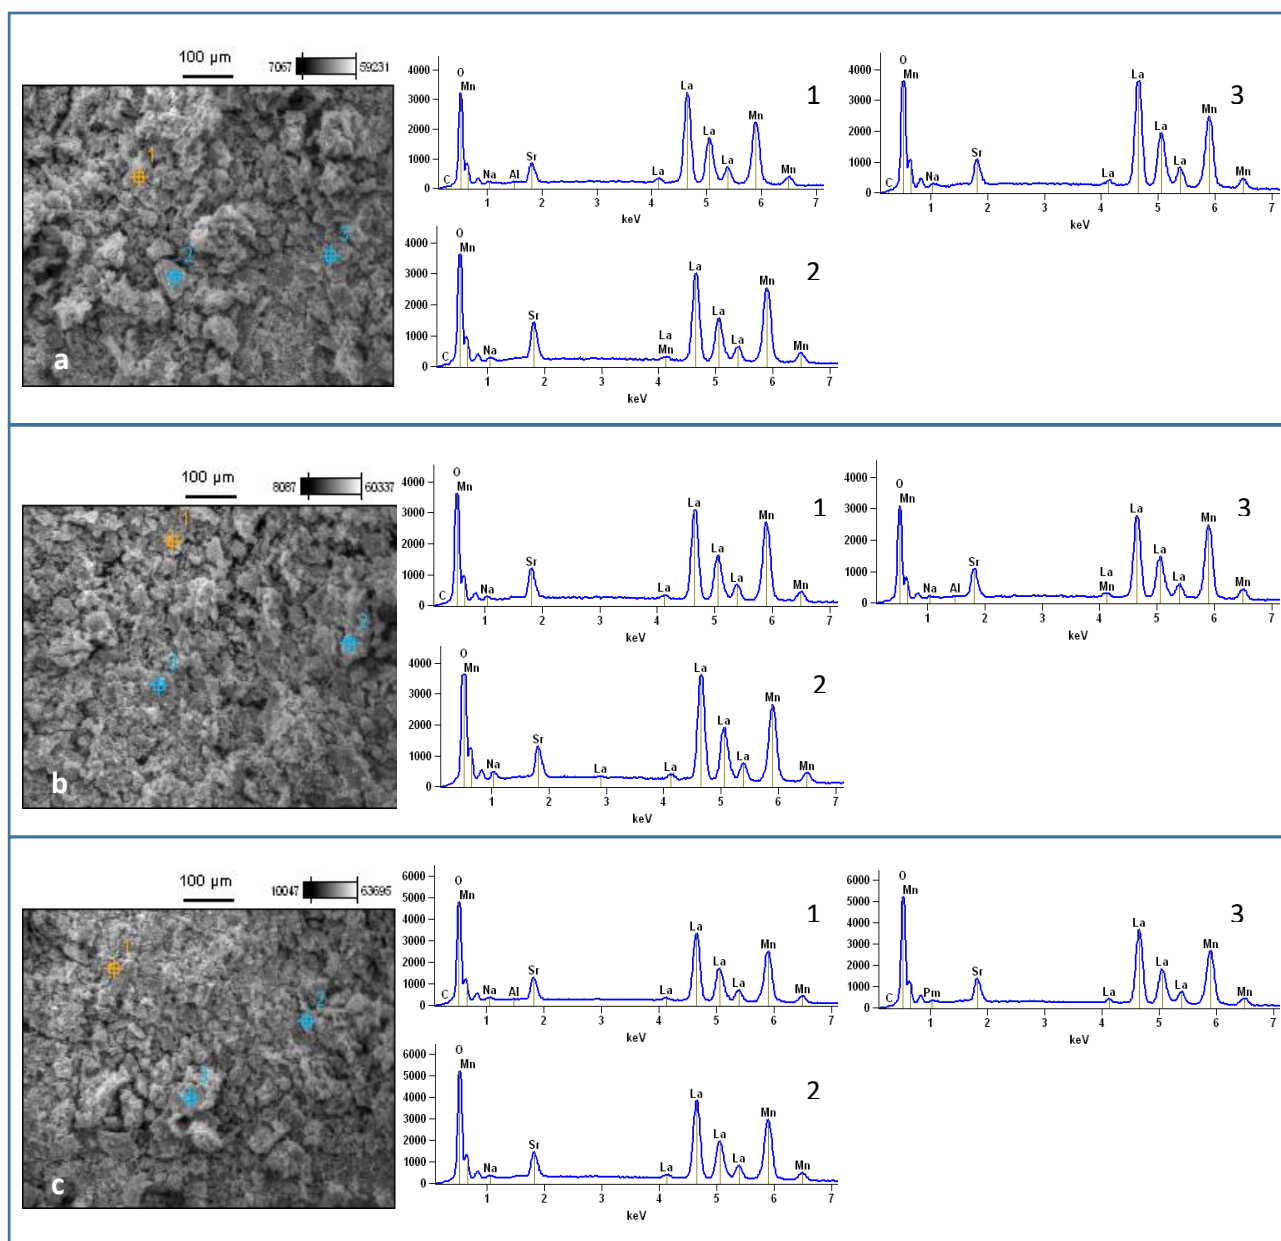

**Figure S11.** SEM images with EDS analysis corresponding to different zones of LSM: (a) zone 1, (b) zone 2 and (c) zone 3.

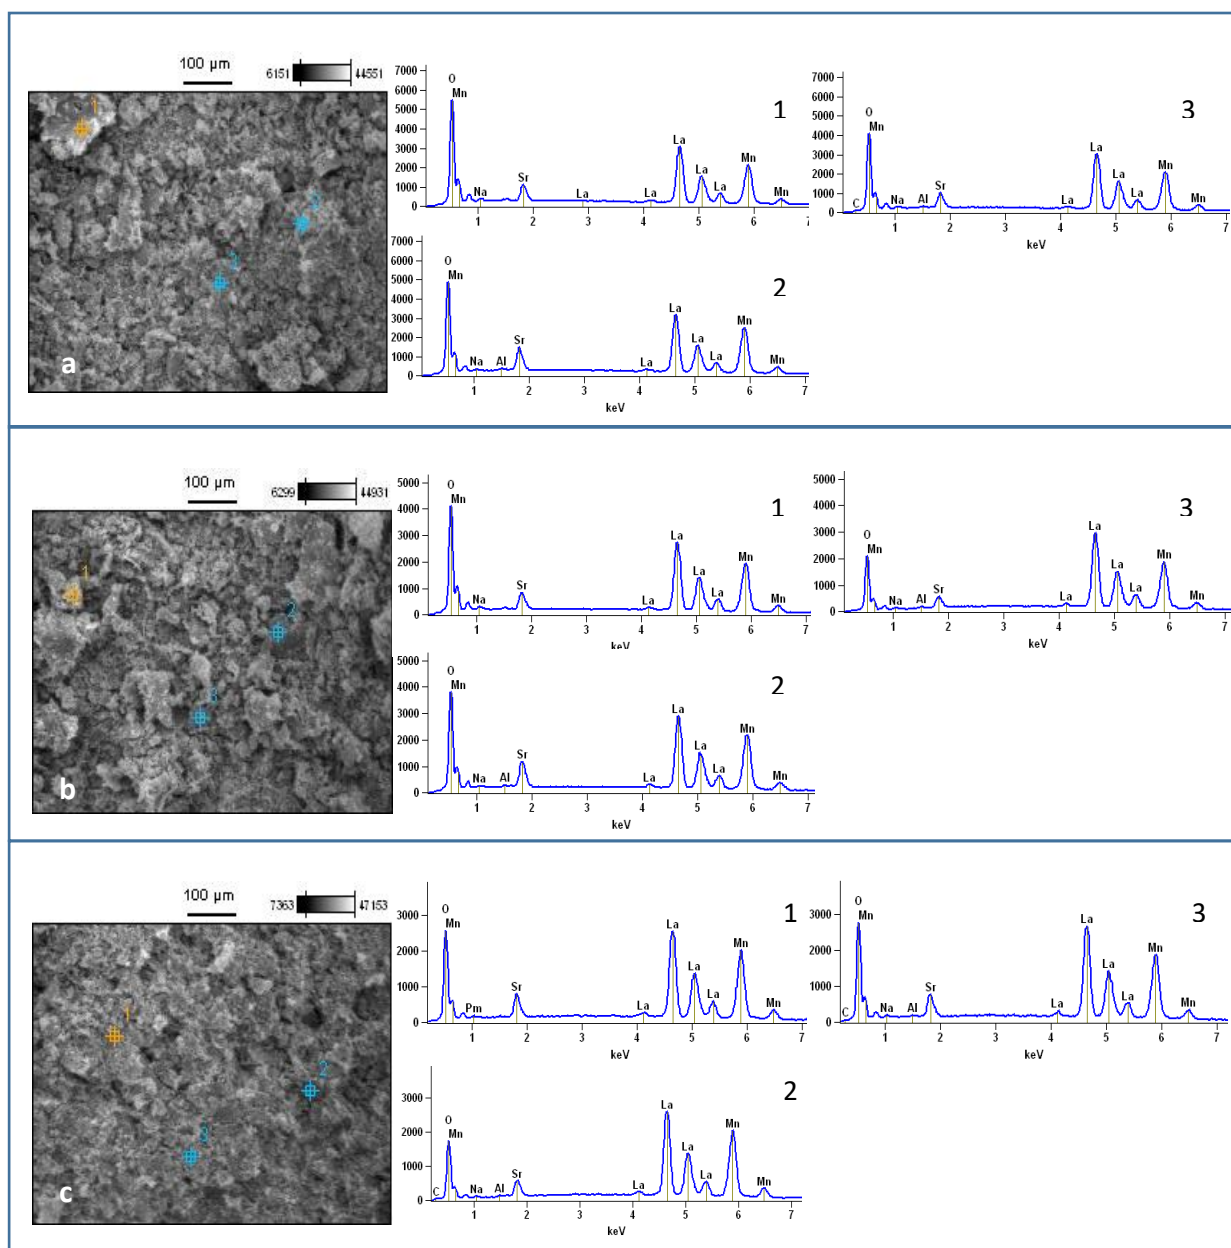

**Figure S12.** SEM images with EDS analysis corresponding to different zones of LSM750: (a) zone 1, (b) zone 2 and (c) zone 3.



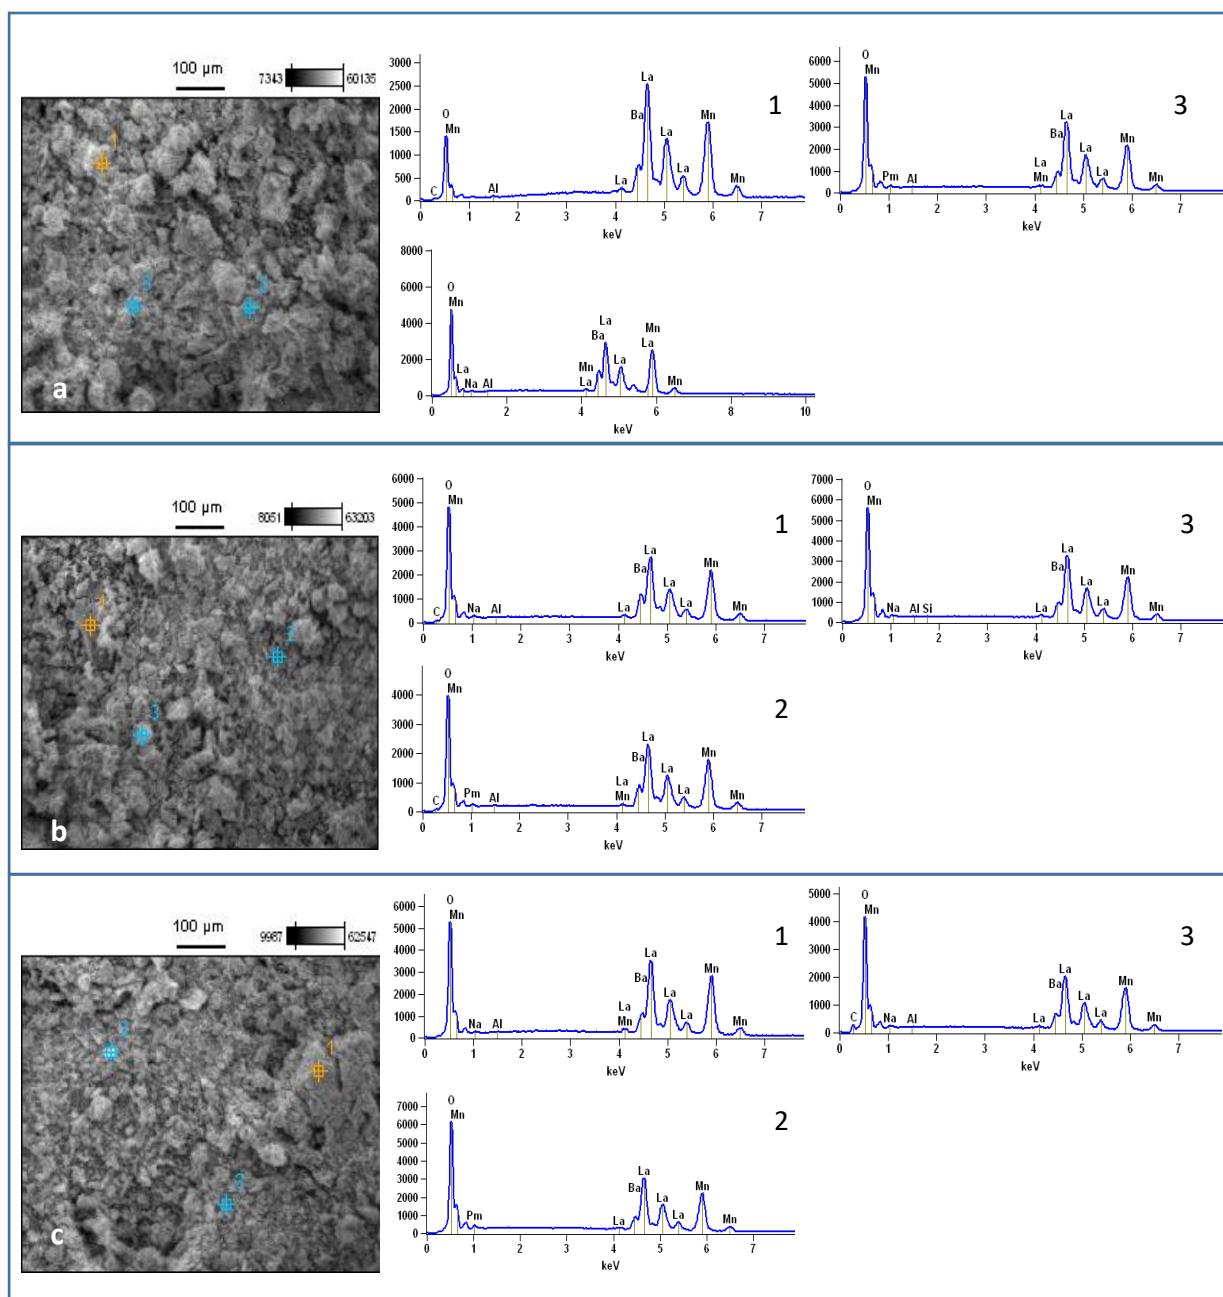

**Figure S13.** SEM images with EDS analysis corresponding to different zones of LBM: (a) zone 1, (b) zone 2 and (c) zone 3.



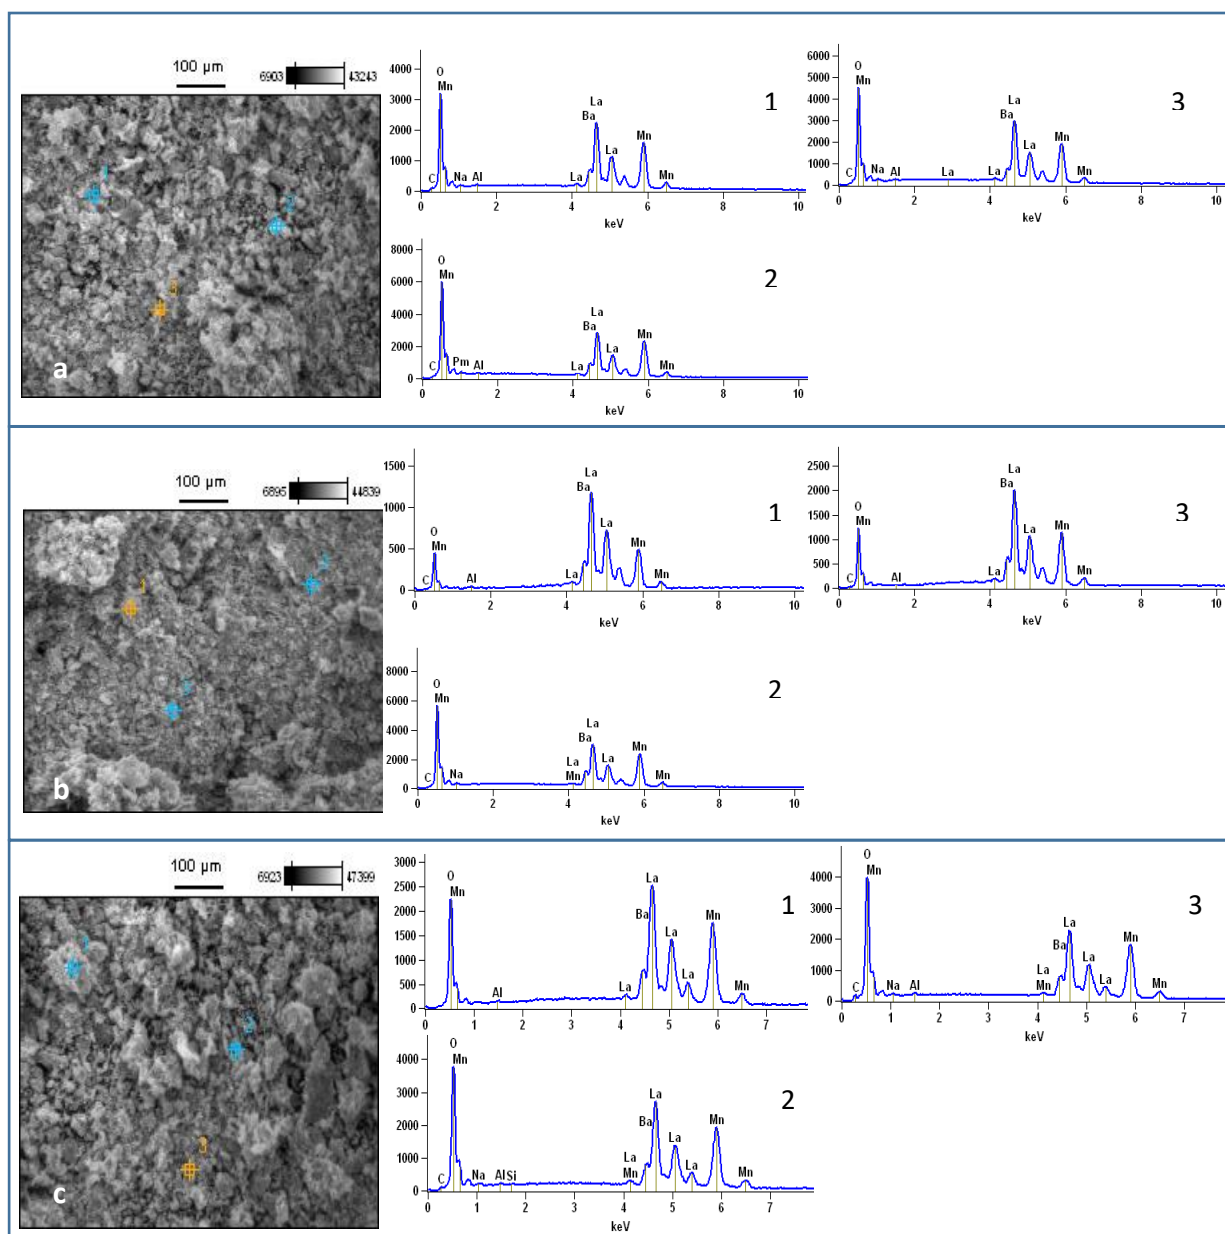

**Figure S14.** SEM images with EDS analysis corresponding to different zones of LBM750: (a) zone 1, (b) zone 2 and (c) zone 3.

**Table S3.** Atom % obtained by EDS corresponding to the points indicated in the different zones of the SEM images for the LM, LM750, LCM and LCM 750 samples.

| Sample | Zone | Atom % |      |      |
|--------|------|--------|------|------|
|        |      | O      | Mn   | La   |
| LM     | 1    | 53.3   | 21.1 | 23.2 |
|        |      | 51.5   | 19.8 | 24.9 |
|        |      | 38.0   | 22.5 | 33.8 |
|        |      | 67.1   | 13.4 | 14.1 |
|        | 2    | 60.4   | 18.4 | 20.1 |
|        |      | 44.3   | 23.6 | 30.4 |
|        |      | 63.2   | 17.0 | 18.1 |
|        | 3    | 63.3   | 15.6 | 16.8 |
|        |      | 63.5   | 17.1 | 17.6 |
|        |      | 59.0   | 18.5 | 21.3 |
| LM750  | 1    | 49.2   | 24.7 | 23.0 |
|        |      | 68.0   | 14.6 | 15.1 |
|        |      | 58.1   | 19.0 | 21.2 |
|        | 2    | 61.5   | 17.1 | 19.3 |
|        |      | 37.9   | 25.0 | 36.7 |
|        |      | 58.3   | 18.4 | 21.3 |
|        | 3    | 59.6   | 19.5 | 19.0 |
|        |      | 65.7   | 15.4 | 16.5 |
|        |      | 55.2   | 20.3 | 23.2 |
| LCM    | 1    | 65.0   | 16.4 | 14.3 |
|        |      | 59.1   | 19.2 | 16.2 |
|        |      | 53.2   | 21.3 | 19.2 |
|        | 2    | 27.0   | 27.9 | 35.3 |
|        |      | 61.2   | 18.2 | 14.4 |
|        |      | 55.3   | 20.1 | 19.2 |
|        | 3    | 69.2   | 14.0 | 12.5 |
|        |      | 60.0   | 19.3 | 15.7 |
|        |      | 48.6   | 24.4 | 19.8 |
| LCM750 | 1    | 57.6   | 18.6 | 18.2 |
|        |      | 60.3   | 18.3 | 15.1 |
|        |      | 52.7   | 20.9 | 20.3 |
|        | 2    | 57.5   | 19.2 | 18.2 |
|        |      | 62.0   | 17.4 | 14.1 |
|        |      | 61.5   | 18.3 | 14.7 |
|        | 3    | 65.4   | 15.9 | 14.2 |
|        |      | 67.5   | 14.5 | 12.2 |

|  |      |      |      |
|--|------|------|------|
|  | 40.6 | 26.2 | 25.7 |
|--|------|------|------|

**Table S4.** Atom % obtained by EDS corresponding to the points indicated in the different zones of the SEM images for the LSM, LSM750, LBM and LBM 750 samples.

| Sample | Zone | Atom % |      |      |
|--------|------|--------|------|------|
|        |      | O      | Mn   | La   |
| LSM    | 1    | 58.2   | 18.2 | 17.0 |
|        |      | 63.8   | 16.8 | 12.6 |
|        |      | 62.5   | 16.1 | 15.6 |
|        | 2    | 62.6   | 18.0 | 13.6 |
|        |      | 66.9   | 14.6 | 12.9 |
|        |      | 59.9   | 20.0 | 14.0 |
|        | 3    | 67.0   | 14.8 | 12.6 |
|        |      | 66.0   | 16.0 | 13.1 |
|        |      | 67.8   | 15.2 | 12.9 |
| LSM750 | 1    | 71.2   | 12.7 | 11.8 |
|        |      | 67.9   | 14.8 | 11.4 |
|        |      | 65.3   | 14.9 | 13.9 |
|        | 2    | 67.3   | 15.0 | 13.3 |
|        |      | 64.6   | 16.2 | 13.0 |
|        |      | 53.1   | 20.8 | 21.4 |
|        | 3    | 59.3   | 19.5 | 16.8 |
|        |      | 48.4   | 25.1 | 20.4 |
|        |      | 58.7   | 18.2 | 16.2 |
| LBM    | 1    | 42.4   | 26.9 | 23.7 |
|        |      | 63.5   | 17.6 | 12.7 |
|        |      | 67.8   | 15.0 | 13.9 |
|        | 2    | 66.0   | 15.2 | 12.0 |
|        |      | 66.1   | 15.6 | 12.7 |
|        |      | 67.6   | 14.2 | 13.4 |
|        | 3    | 64.2   | 17.5 | 13.3 |
|        |      | 71.0   | 14.2 | 12.1 |
|        |      | 59.3   | 11.6 | 9.0  |
| LBM750 | 1    | 61.9   | 16.6 | 14.7 |
|        |      | 69.4   | 14.3 | 11.0 |
|        |      | 65.0   | 15.3 | 14.6 |
|        | 2    | 35.1   | 22.3 | 33.6 |
|        |      | 67.6   | 15.3 | 12.2 |
|        |      | 45.1   | 22.1 | 25.0 |
|        | 3    | 53.3   | 21.6 | 19.8 |
|        |      | 61.7   | 16.8 | 14.6 |

|  |      |      |      |
|--|------|------|------|
|  | 61.1 | 14.3 | 11.0 |
|--|------|------|------|

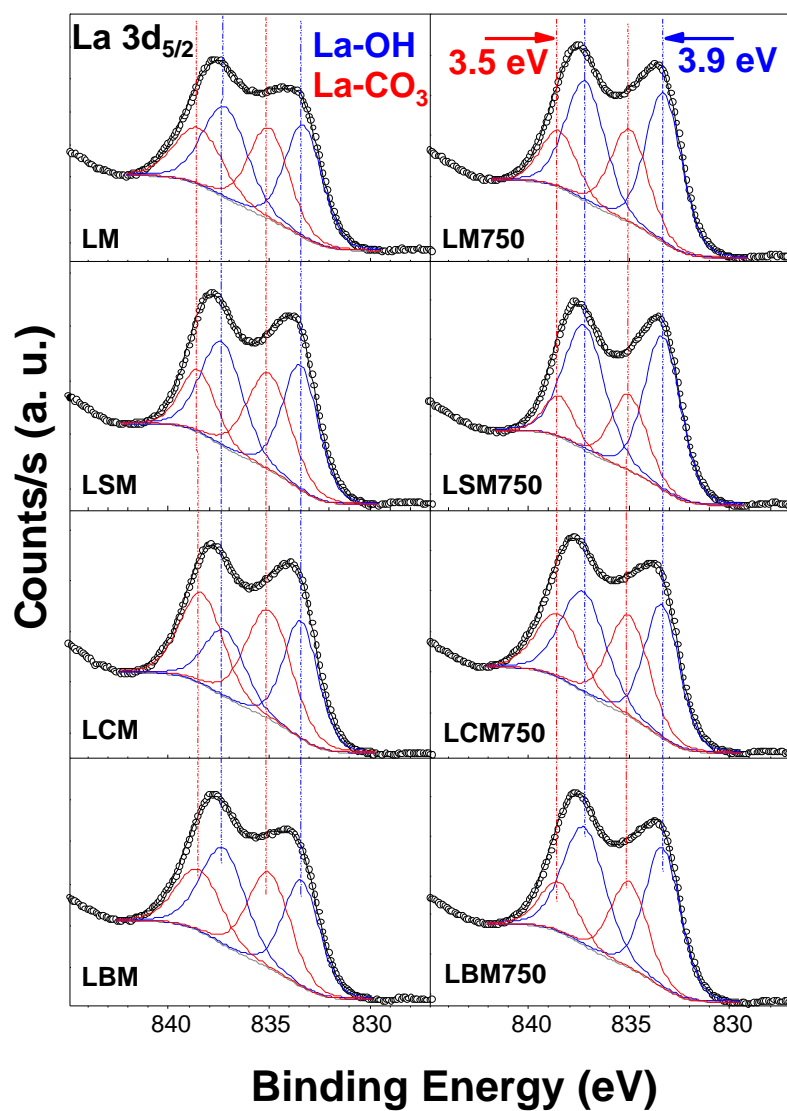

**Figure S15.** La  $3d_{5/2}$  XPS spectra (dots) for all samples before and after the thermal treatments fitted with two chemical components, named La-OH (blue lines) and La-CO<sub>3</sub> (red lines), which present 3.9 and 3.5 eV splitting, respectively.

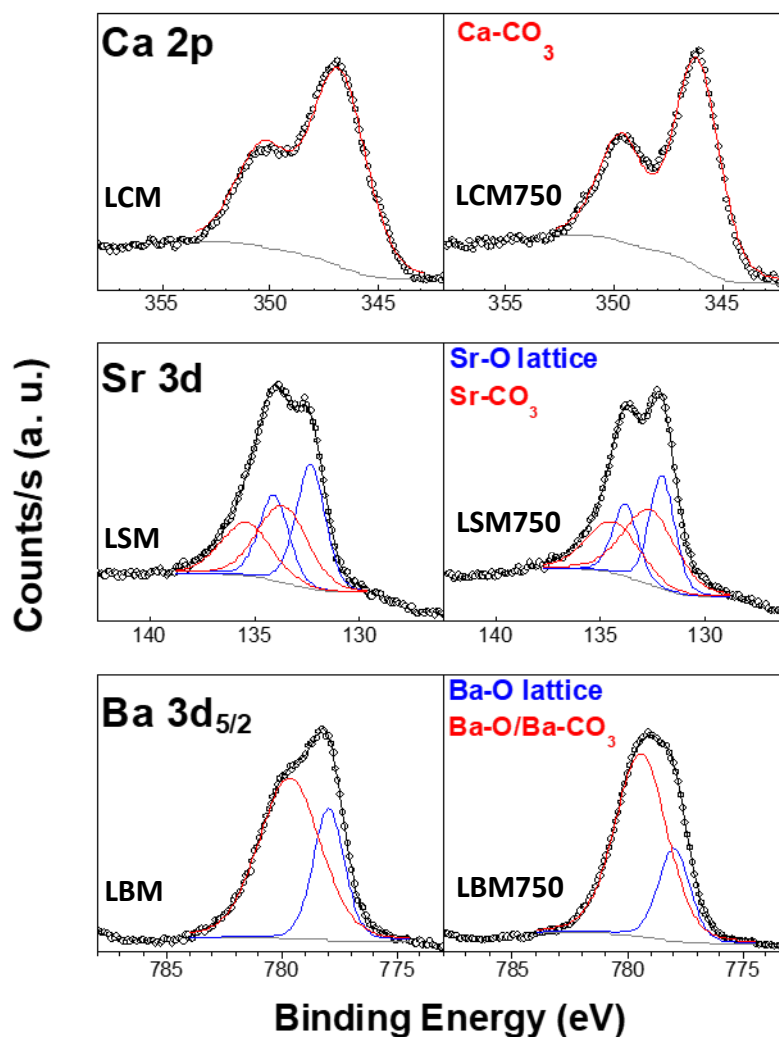

**Figure S16.** Ca 2p, Sr 3d, and Ba 3d<sub>5/2</sub> high-resolution XPS spectra (dots) acquired before and after the thermal treatments. Also shown are the corresponding chemical components indicated in the figure legends (blue and red lines).

### Interpretation of XPS results

Figure S15 shows the high resolution La 3d<sub>5/2</sub> XPS spectra of the as-prepared and calcined samples. The La 3d signal presents well separated spin-orbit components (3d<sub>3/2</sub> and 3d<sub>5/2</sub>) where each component can be fitted considering further multiplet splitting [1] with well-known energy separation. Therefore, the La 3d<sub>5/2</sub> region fit requires two pairs of peaks corresponding to two chemical components, named La-OH (hydroxide) and La-CO<sub>3</sub> (carbonate), each presenting 3.9 and 3.5 eV splitting, respectively. This is a more accurate approach to ascertain the lanthanum chemical components rather than by determining the 3d<sub>5/2</sub> peak position, since the later have very close binding energy values for distinct La chemical states (for instance, La<sub>2</sub>O<sub>3</sub>, La(OH)<sub>3</sub> or La<sub>2</sub>(CO<sub>3</sub>)<sub>3</sub>). Based on the fit it was possible to conclude that La atoms in a mixed oxide state, i.e. La<sub>2</sub>O<sub>3</sub>, are not present, which would correspond to a component presenting a 4.6 eV multiplet splitting. [2] The presence of surface hydroxide and carbonate is not a surprise since La compounds may hydrolyze and easily form carbonates by reacting with CO<sub>2</sub>.

at room temperature. The XPS signals emitted by the A metals in  $\text{La}_{0.8}\text{A}_{0.2}\text{MnO}_3$  samples are shown in Figure S16. The Ca 2*p*, Sr 3*d*, and Ba 3*d*<sub>5/2</sub> peaks were fitted considering different chemical components for each case [3]. For the LCM and LCM750 samples, the Ca 2*p* spectrum clearly presents only one chemical component assigned to  $\text{CaCO}_3$ , which was also fitted with two peaks (Ca 2*p*<sub>1/2</sub> and Ca 2*p*<sub>3/2</sub>) separated by the spin orbit splitting of 3.5 eV. In the case of LSM and LSM750 samples, two chemical components were required in order to fit the Sr 3*d*, corresponding to Sr-O bonds in the structure and Sr- $\text{CO}_3$  bonds (carbonate). Each component consisted of two peaks accounting for the spin orbit splitting (Sr 3*d*<sub>3/2</sub> and Sr 3*d*<sub>5/2</sub>). Regarding the LBM and LBM750 samples, the Ba 3*d*<sub>5/2</sub> peak fitting demanded the use of two chemical states, one at lower binding energy that is related to Ba-O bonds in the structure, and another wider component that can be assigned to either Ba-O species (non-bulk) or Ba- $\text{CO}_3$  bonds (carbonate). Based solely on the XPS results shown above, it is most likely this wider component is mainly a result of surface carbonates.

## References

1. Shirley, D.A. High-Resolution X-Ray Photoemission Spectrum of the Valence Bands of Gold. *Phys. Rev. B* **1972**, 5(12), 4709-4714.
2. Sunding, M.F.; Hadidi, K.; Diplas, S.; Lovvik, O.M.; Norby, T.E.; Gunnaes, A.E. XPS characterization of in situ treated lanthanum oxide and hydroxide using tailored charge referencing and peak fitting procedures. *J. Electron Spectrosc. Related Phenom.* **2011**, 184, 399-409.
3. Li, J.P.H.; Zhou, X.; Pang, Y.; Zhu, L.; Vovk, E.I.; Cong, L.; van Bavel, A.P.; Li, S.; Yang, Y. Understanding of binding energy calibration in XPS of lanthanum oxide by in situ treatment. *Phys. Chem. Chem. Phys.* **2019**, 21, 22351.
